# Supplementary material for: The Association between Gender and Physical Activity Was Partially Mediated by Social Network Size during COVID-19
Source: MDPI journal article supplement (doi:10.3390/ijerph19052495), 2022-02-22
Supplement: s1 [file s1]

### **Supplementary Materials**

**Syntax S1: SPSS syntax that was written to screen for attention check questions.**

```
COMPUTE workidAgree_ELIG=survey1_workid = screen_workid.  
EXECUTE.
```

```
COMPUTE YearBornApproxAge=2020 - yearborn.  
EXECUTE.
```

```
COMPUTE AgeDiscrepancyAmt=YearBornApproxAge - age.  
EXECUTE.
```

```
RECODE AgeDiscrepancyAmt (1=1) (-1=1) (0=1) (ELSE=0) INTO AgeDiscrep_ELIG.  
VARIABLE LABELS AgeDiscrep_ELIG 'Eligible to continue based on accuracy of age estimation'.  
EXECUTE.
```

```
COMPUTE WorkIDAgree_FinELIG=workidAgree_ELIG + 0.  
EXECUTE.
```

```
COMPUTE AgeDiscrep_FinELIG=AgeDiscrep_ELIG + 0.  
EXECUTE.
```

```
COMPUTE SumEligibility=SUM(WorkIDAgree_FinELIG, AgeDiscrep_FinELIG)  
EXECUTE.
```

```
RECODE SumEligibility (2=1) (ELSE=0) INTO ELIGFINAL_Survey1.  
VARIABLE LABELS ELIGFINAL_Survey1 'SumEligibility recoded'.  
EXECUTE.
```
